# Supplementary material for: Synthesis and structural characterization of 3d–4f heterometallic coordination polymers: from cluster to chain
Source: Royal Society of Chemistry journal article supplement (doi:10.1039/c3nj41064a), 2013-01-01

Supplemental Material for:

**Synthesis and structural characterization of 3d-4f heterometallic coordination polymers: from cluster to chain**

**Chunjing Zhang<sup>a,b</sup>, Yanyan Chen<sup>a</sup>, Huiyuan Ma<sup>a\*</sup>, Tingting Yu<sup>a</sup>, Bo Liu<sup>a\*</sup>, Haijun Pang<sup>a</sup>**

*<sup>a</sup>Key Laboratory of Green Chemical Engineering and Technology of College of Heilongjiang Province, College of Chemical and Environmental Engineering, Harbin University of Science and Technology, Harbin 150040, P. R. China*

*<sup>b</sup>College of Pharmaceutical Sciences, Heilongjiang University of Chinese Medicine, Harbin 150040, P. R. China*

**Table of contents:**

1. **Table S1** Selected bond lengths [Å] and bond angles [°] for compound **1**.
2. **Table S2** Selected bond lengths [Å] and bond angles [°] for compound **2**.
3. **Table S3** Bond-valence Sums for the Mn and Ce Atoms of compound **1**.
4. **Table S4** Bond-valence Sums for the Mn and Nd Atoms of compound **2**.
5. **Fig. S1** The distances between metals in the [Ce<sub>3</sub>Mn<sub>2</sub>O<sub>6</sub>]<sup>8+</sup> core.
6. **Fig. S2** The IR curves of compounds **1** and **2**.
7. **Fig. S3** The simulative (black) and experimental (red) PXRD patterns of compounds **1** and **2**.
8. **Fig. S4** TGA-DTA curves of compounds **1** and **2**.
9. **Fig. S5** The  $\chi_m^{-1}$  versus  $T$  plots of compounds **1** and **2**.

Table S1. Selected bond lengths [Å] and bond angles [°] for compound **1**

|                       |           |                      |           |
|-----------------------|-----------|----------------------|-----------|
| Ce(1)-O(13)#1         | 2.299(10) | Ce(1)-O(13)          | 2.299(10) |
| Ce(1)-O(2)            | 2.326(9)  | Ce(1)-O(2)#1         | 2.326(9)  |
| Ce(1)-O(1W)#1         | 2.445(14) | Ce(1)-O(1W)          | 2.445(14) |
| Ce(1)-O(5)            | 2.435(15) | Ce(1)-O(1)           | 2.471(15) |
| Ce(2)-O(13)           | 2.301(9)  | Ce(2)-O(10)          | 2.318(7)  |
| Ce(2)-O(4)            | 2.331(8)  | Ce(2)-O(2)           | 2.333(10) |
| Ce(2)-O(2W)           | 2.390(10) | Ce(2)-O(9)           | 2.447(10) |
| Ce(2)-O(11)           | 2.438(10) | Ce(2)-O(7)           | 2.454(10) |
| Ce(2)-O(15)           | 2.542(10) |                      |           |
| Mn(1)-O(4)            | 1.818(12) | Mn(1)-O(13)#1        | 1.835(9)  |
| Mn(1)-O(13)           | 1.835(9)  | Mn(1)-O(12)          | 1.968(13) |
| Mn(1)-O(3)#2          | 1.985(9)  | Mn(1)-O(3)#3         | 1.985(9)  |
| Mn(2)-O(2)#1          | 1.812(9)  | Mn(2)-O(2)           | 1.812(9)  |
| Mn(2)-O(10)           | 1.830(13) | Mn(2)-O(8)           | 1.971(9)  |
| Mn(2)-O(8)#1          | 1.971(9)  | Mn(2)-O(14)          | 2.023(14) |
| O(13)#1-Ce(1)-O(13)   | 66.7(4)   | O(13)#1-Ce(1)-O(2)   | 103.1(3)  |
| O(13)-Ce(1)-O(2)      | 67.9(3)   | O(13)#1-Ce(1)-O(2)#1 | 67.9(3)   |
| O(13)-Ce(1)-O(2)#1    | 103.1(3)  | O(2)-Ce(1)-O(2)#1    | 66.5(5)   |
| O(13)#1-Ce(1)-O(1W)#1 | 81.4(4)   | O(13)-Ce(1)-O(1W)#1  | 142.0(4)  |
| O(2)-Ce(1)-O(1W)#1    | 142.9(4)  | O(2)#1-Ce(1)-O(1W)#1 | 82.1(5)   |
| O(13)#1-Ce(1)-O(1W)   | 142.0(4)  | O(13)-Ce(1)-O(1W)    | 81.4(4)   |
| O(2)-Ce(1)-O(1W)      | 82.1(5)   | O(2)#1-Ce(1)-O(1W)   | 142.9(4)  |
| O(1W)#1-Ce(1)-O(1W)   | 117.0(9)  | O(13)#1-Ce(1)-O(5)   | 76.2(3)   |
| O(13)-Ce(1)-O(5)      | 76.2(3)   | O(2)-Ce(1)-O(5)      | 140.4(3)  |
| O(2)#1-Ce(1)-O(5)     | 140.4(3)  | O(1W)#1-Ce(1)-O(5)   | 76.6(4)   |
| O(1W)-Ce(1)-O(5)      | 76.6(4)   | O(13)#1-Ce(1)-O(1)   | 140.0(3)  |
| O(13)-Ce(1)-O(1)      | 140.0(3)  | O(2)-Ce(1)-O(1)      | 75.6(4)   |
| O(2)#1-Ce(1)-O(1)     | 75.6(4)   | O(1W)#1-Ce(1)-O(1)   | 78.0(4)   |
| O(1W)-Ce(1)-O(1)      | 78.0(4)   | O(5)-Ce(1)-O(1)      | 130.1(5)  |
| O(13)-Ce(2)-O(10)     | 103.3(3)  | O(13)-Ce(2)-O(4)     | 66.8(4)   |
| O(10)-Ce(2)-O(4)      | 69.4(4)   | O(13)-Ce(2)-O(2)     | 67.7(3)   |
| O(10)-Ce(2)-O(2)      | 66.7(4)   | O(4)-Ce(2)-O(2)      | 104.5(4)  |
| O(13)-Ce(2)-O(2W)     | 81.0(3)   | O(10)-Ce(2)-O(2W)    | 140.4(4)  |
| O(4)-Ce(2)-O(2W)      | 142.3(4)  | O(2)-Ce(2)-O(2W)     | 79.4(4)   |
| O(13)-Ce(2)-O(9)      | 75.7(3)   | O(10)-Ce(2)-O(9)     | 140.8(4)  |
| O(4)-Ce(2)-O(9)       | 74.7(4)   | O(2)-Ce(2)-O(9)      | 139.7(3)  |
| O(2W)-Ce(2)-O(9)      | 78.8(4)   | O(13)-Ce(2)-O(11)    | 139.9(3)  |
| O(10)-Ce(2)-O(11)     | 75.0(3)   | O(4)-Ce(2)-O(11)     | 140.6(4)  |
| O(2)-Ce(2)-O(11)      | 75.5(3)   | O(9)-Ce(2)-O(11)     | 130.8(3)  |

|                     |          |                      |          |
|---------------------|----------|----------------------|----------|
| O(2W)-Ce(2)-O(11)   | 77.1(4)  | O(13)-Ce(2)-O(7)     | 141.3(3) |
| O(10)-Ce(2)-O(7)    | 75.0(4)  | O(4)-Ce(2)-O(7)      | 77.0(4)  |
| O(2)-Ce(2)-O(7)     | 137.7(3) | O(2W)-Ce(2)-O(7)     | 125.3(3) |
| O(9)-Ce(2)-O(7)     | 82.2(4)  | O(11)-Ce(2)-O(7)     | 78.0(4)  |
| O(13)-Ce(2)-O(15)   | 135.8(3) | O(10)-Ce(2)-O(15)    | 119.2(4) |
| O(4)-Ce(2)-O(15)    | 115.8(4) | O(2)-Ce(2)-O(15)     | 138.8(3) |
| O(2W)-Ce(2)-O(15)   | 74.1(4)  | O(9)-Ce(2)-O(15)     | 64.1(3)  |
| O(11)-Ce(2)-O(15)   | 68.3(3)  | O(7)-Ce(2)-O(15)     | 51.5(3)  |
| O(4)-Mn(1)-O(13)#1  | 88.6(4)  | O(4)-Mn(1)-O(13)     | 88.6(4)  |
| O(13)#1-Mn(1)-O(13) | 87.1(6)  | O(4)-Mn(1)-O(12)     | 174.1(6) |
| O(13)#1-Mn(1)-O(12) | 95.7(4)  | O(13)-Mn(1)-O(12)    | 95.7(4)  |
| O(4)-Mn(1)-O(3)#2   | 94.0(4)  | O(13)#1-Mn(1)-O(3)#2 | 94.8(4)  |
| O(13)-Mn(1)-O(3)#2  | 176.9(4) | O(12)-Mn(1)-O(3)#2   | 81.6(4)  |
| O(4)-Mn(1)-O(3)#3   | 94.0(4)  | O(13)#1-Mn(1)-O(3)#3 | 176.9(4) |
| O(13)-Mn(1)-O(3)#3  | 94.8(4)  | O(12)-Mn(1)-O(3)#3   | 81.6(4)  |
| O(3)#2-Mn(1)-O(3)#3 | 83.3(6)  | O(2)#1-Mn(2)-O(2)    | 89.5(6)  |
| O(2)#1-Mn(2)-O(10)  | 89.2(4)  | O(2)-Mn(2)-O(10)     | 89.2(4)  |
| O(2)#1-Mn(2)-O(8)   | 174.9(4) | O(2)-Mn(2)-O(8)      | 94.4(4)  |
| O(10)-Mn(2)-O(8)    | 94.0(4)  | O(2)#1-Mn(2)-O(8)#1  | 94.4(4)  |
| O(2)-Mn(2)-O(8)#1   | 174.9(4) | O(10)-Mn(2)-O(8)#1   | 94.0(4)  |
| O(8)-Mn(2)-O(8)#1   | 81.6(6)  | O(2)#1-Mn(2)-O(14)   | 93.9(4)  |
| O(2)-Mn(2)-O(14)    | 93.9(4)  | O(10)-Mn(2)-O(14)    | 175.5(6) |
| O(8)-Mn(2)-O(14)    | 82.6(4)  | O(8)#1-Mn(2)-O(14)   | 82.6(4)  |

Symmetry transformations used to generate equivalent atoms: #3  $x-1/2, y, -z+1/2$

Table S2. Selected bond lengths [ $\text{\AA}$ ] and bond angles [ $^\circ$ ] for compound **2**

|                     |            |                     |            |
|---------------------|------------|---------------------|------------|
| Nd(1)-O(8)          | 2.377(3)   | Nd(1)-O(6)          | 2.411(3)   |
| Nd(1)-O(5)          | 2.439(3)   | Nd(1)-O(2W)         | 2.487(4)   |
| Nd(1)-O(7)          | 2.490(3)   | Nd(1)-O(3)          | 2.508(3)   |
| Nd(1)-O(3W)         | 2.511(3)   | Nd(1)-O(4)          | 2.590(3)   |
| Nd(1)-O(6)#1        | 2.713(3)   |                     |            |
| Mn(1)-O(1)#2        | 2.172(3)   | Mn(1)-O(1)          | 2.172(3)   |
| Mn(1)-O(7)          | 2.177(3)   | Mn(1)-O(7)#2        | 2.177(3)   |
| Mn(1)-O(2)          | 2.194(3)   | Mn(1)-O(2)#2        | 2.194(3)   |
| O(8)-Nd(1)-O(6)     | 83.93(12)  | O(8)-Nd(1)-O(5)     | 76.33(12)  |
| O(6)-Nd(1)-O(5)     | 82.99(11)  | O(8)-Nd(1)-O(2W)    | 68.70(13)  |
| O(6)-Nd(1)-O(2W)    | 87.67(14)  | O(5)-Nd(1)-O(2W)    | 144.55(12) |
| O(8)-Nd(1)-O(7)     | 75.25(11)  | O(6)-Nd(1)-O(7)     | 157.01(11) |
| O(5)-Nd(1)-O(7)     | 82.71(10)  | O(2W)-Nd(1)-O(7)    | 93.65(14)  |
| O(8)-Nd(1)-O(3)     | 142.63(11) | O(6)-Nd(1)-O(3)     | 114.35(11) |
| O(5)-Nd(1)-O(3)     | 74.20(12)  | O(2W)-Nd(1)-O(3)    | 139.81(13) |
| O(7)-Nd(1)-O(3)     | 78.67(11)  | O(8)-Nd(1)-O(3W)    | 137.30(11) |
| O(6)-Nd(1)-O(3W)    | 77.88(11)  | O(5)-Nd(1)-O(3W)    | 137.60(11) |
| O(2W)-Nd(1)-O(3W)   | 72.23(13)  | O(7)-Nd(1)-O(3W)    | 124.33(11) |
| O(3)-Nd(1)-O(3W)    | 79.85(12)  | O(8)-Nd(1)-O(4)     | 111.70(12) |
| O(6)-Nd(1)-O(4)     | 150.20(11) | O(5)-Nd(1)-O(4)     | 124.47(11) |
| O(2W)-Nd(1)-O(4)    | 75.73(13)  | O(7)-Nd(1)-O(4)     | 50.80(9)   |
| O(3)-Nd(1)-O(4)     | 68.91(12)  | O(3W)-Nd(1)-O(4)    | 73.58(10)  |
| O(8)-Nd(1)-O(6)#1   | 136.24(12) | O(6)-Nd(1)-O(6)#1   | 65.37(11)  |
| O(5)-Nd(1)-O(6)#1   | 69.89(11)  | O(2W)-Nd(1)-O(6)#1  | 135.26(13) |
| O(7)-Nd(1)-O(6)#1   | 125.22(10) | O(3)-Nd(1)-O(6)#1   | 49.02(10)  |
| O(3W)-Nd(1)-O(6)#1  | 67.76(11)  | O(4)-Nd(1)-O(6)#1   | 110.14(10) |
| O(1)#2-Mn(1)-O(1)   | 180.0      | O(1)#2-Mn(1)-O(7)   | 89.13(12)  |
| O(1)-Mn(1)-O(7)     | 90.87(12)  | O(1)#2-Mn(1)-O(7)#2 | 90.87(12)  |
| O(1)-Mn(1)-O(7)#2   | 89.13(12)  | O(7)-Mn(1)-O(7)#2   | 180.0      |
| O(1)#2-Mn(1)-O(2)   | 83.05(13)  | O(1)-Mn(1)-O(2)     | 96.95(13)  |
| O(7)-Mn(1)-O(2)     | 91.90(12)  | O(7)#2-Mn(1)-O(2)   | 88.10(12)  |
| O(1)#2-Mn(1)-O(2)#2 | 96.95(13)  | O(1)-Mn(1)-O(2)#2   | 83.05(13)  |
| O(7)-Mn(1)-O(2)#2   | 88.10(12)  | O(7)#2-Mn(1)-O(2)#2 | 91.90(12)  |
| O(2)-Mn(1)-O(2)#2   | 180.0      |                     |            |

Symmetry transformations used to generate equivalent atoms: #1 -x,-y,-z-1 and #2 -x,-y,-z

Table S3. Bond-valence Sums for the Mn and Ce Atoms of compound **1**

| atom | Mn <sup>II</sup> | Mn <sup>III</sup> | Mn <sup>IV</sup> | atom | Ce <sup>III</sup> | Ce <sup>IV</sup> |
|------|------------------|-------------------|------------------|------|-------------------|------------------|
| Mn1  | 4.50             | 4.15              | <u>4.04</u>      | Ce1  | 4.03              | <u>3.75</u>      |
| Mn2  | 4.54             | 4.19              | <u>4.08</u>      | Ce2  | 4.38              | <u>4.07</u>      |

Table S4. Bond-valence Sums for the Mn and Nd Atoms of compound **2**

| atom | Mn <sup>II</sup> | Mn <sup>III</sup> | Mn <sup>IV</sup> | atom | Nd <sup>III</sup> |
|------|------------------|-------------------|------------------|------|-------------------|
| Mn1  | <u>2.09</u>      | 1.92              | 1.87             | Nd1  | <u>3.27</u>       |

Fig. S1 The distances between metals in the [Ce<sub>3</sub>Mn<sub>2</sub>O<sub>6</sub>]<sup>8+</sup> core.

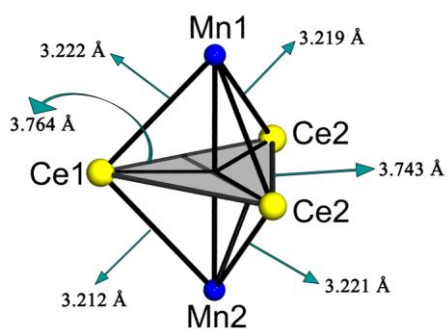

Fig. S2 The IR curves of compounds **1** and **2**.

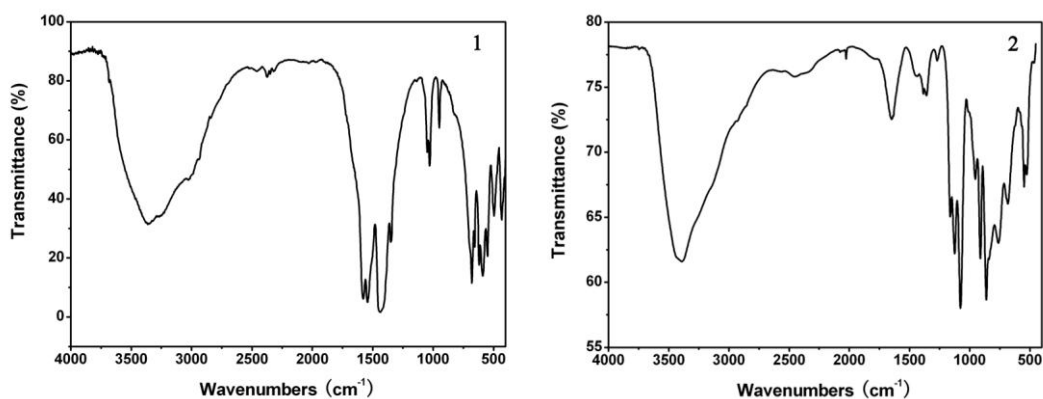

Fig. S3 The simulative (black) and experimental (red) PXRD patterns of compounds **1** and **2**.

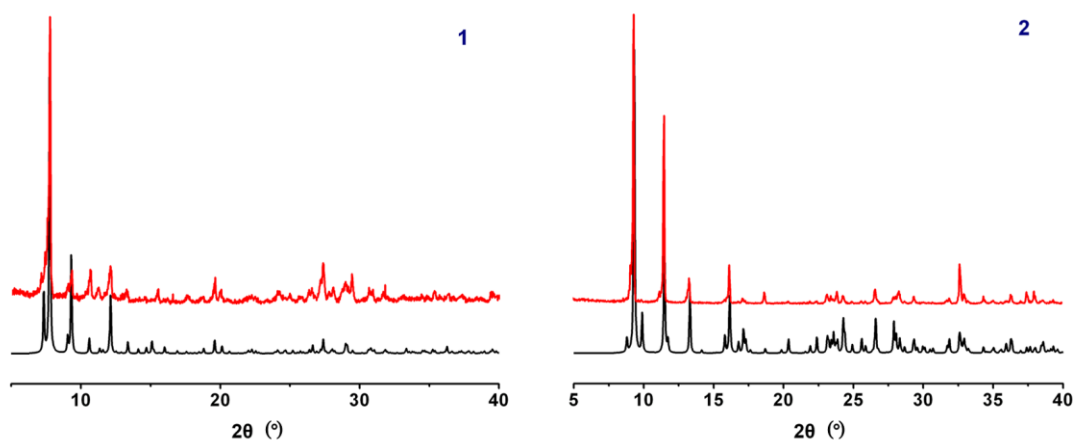

Fig. S4 TGA-DTA curves of compounds **1** and **2**.

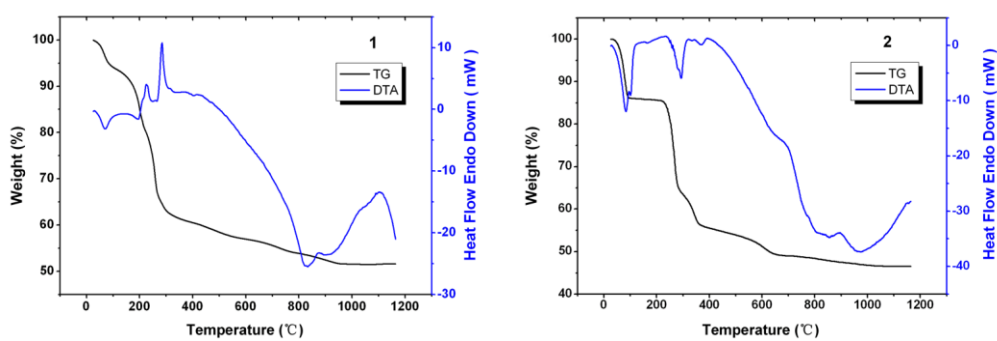

Fig. S5 The  $\chi_m^{-1}$  versus  $T$  plots of compounds **1** and **2**.

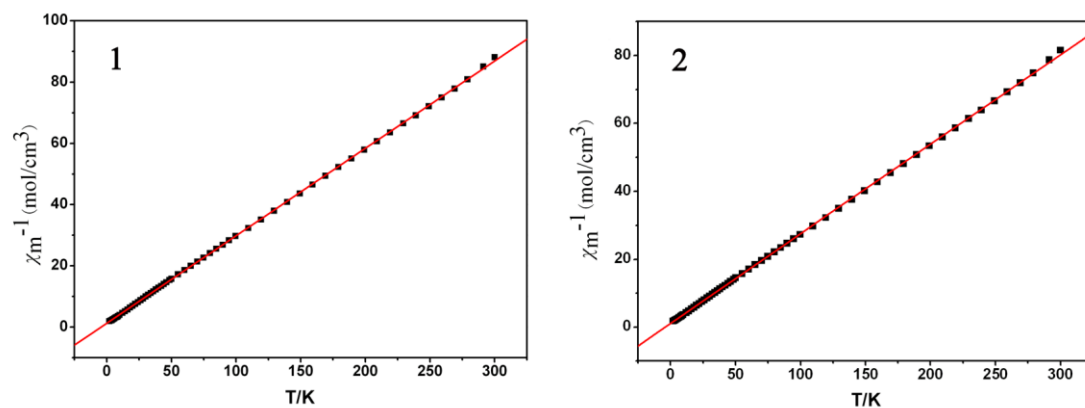

Supplement: c3nj41064a.pdf [file c3nj41064a.pdf]
